# Supplementary material
Source: PubMed Central journal article supplement (PMC5726277)

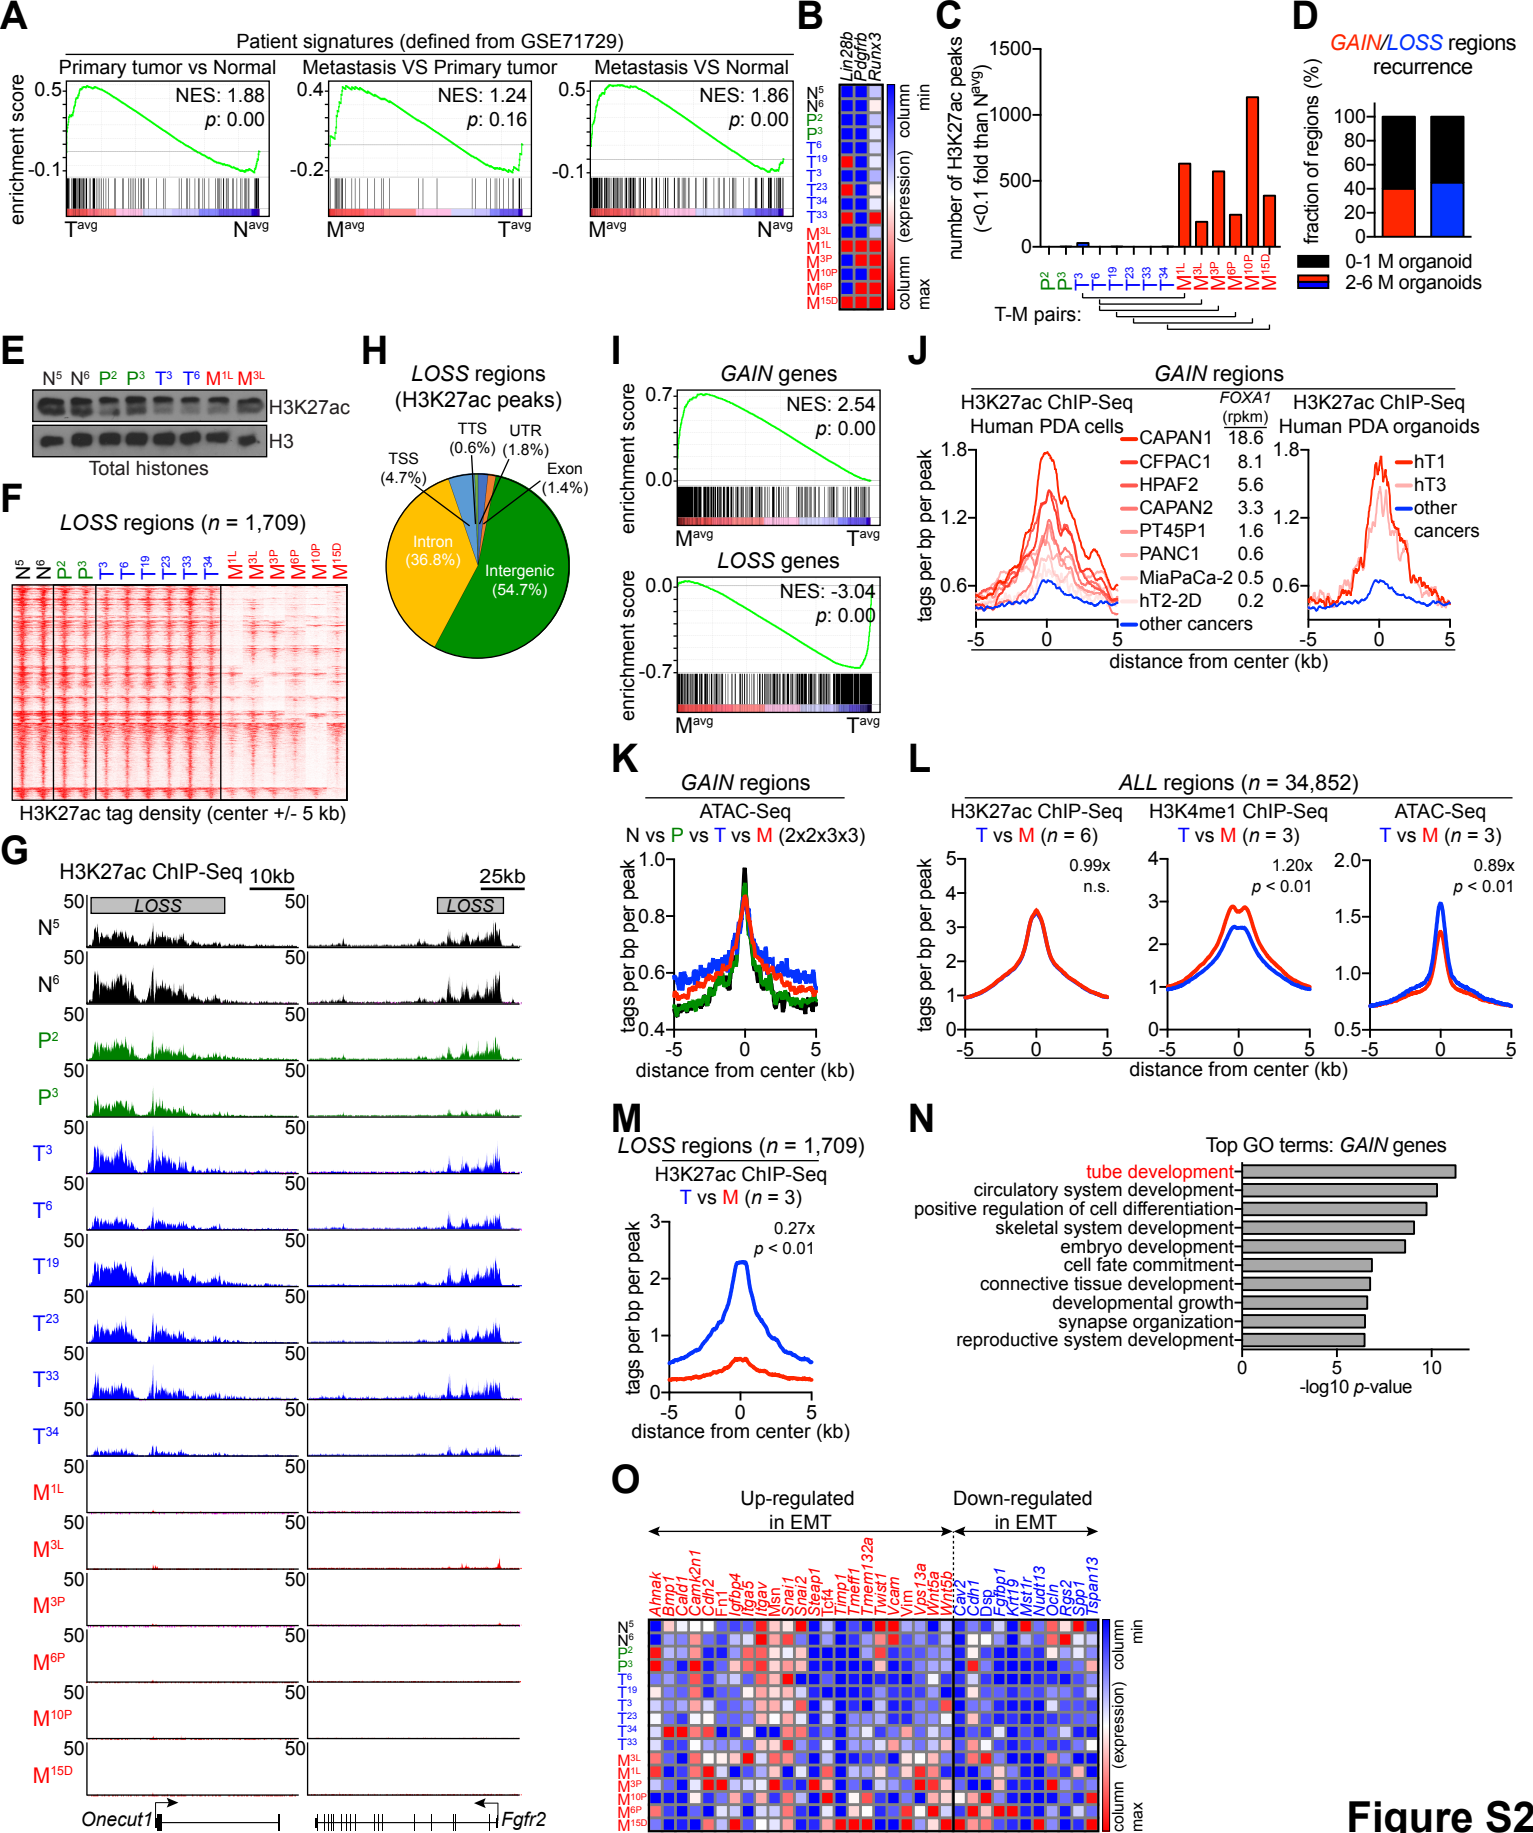

Figure S2

Supplement: NIHMS895831-supplement-2.pdf [file NIHMS895831-supplement-2.pdf]

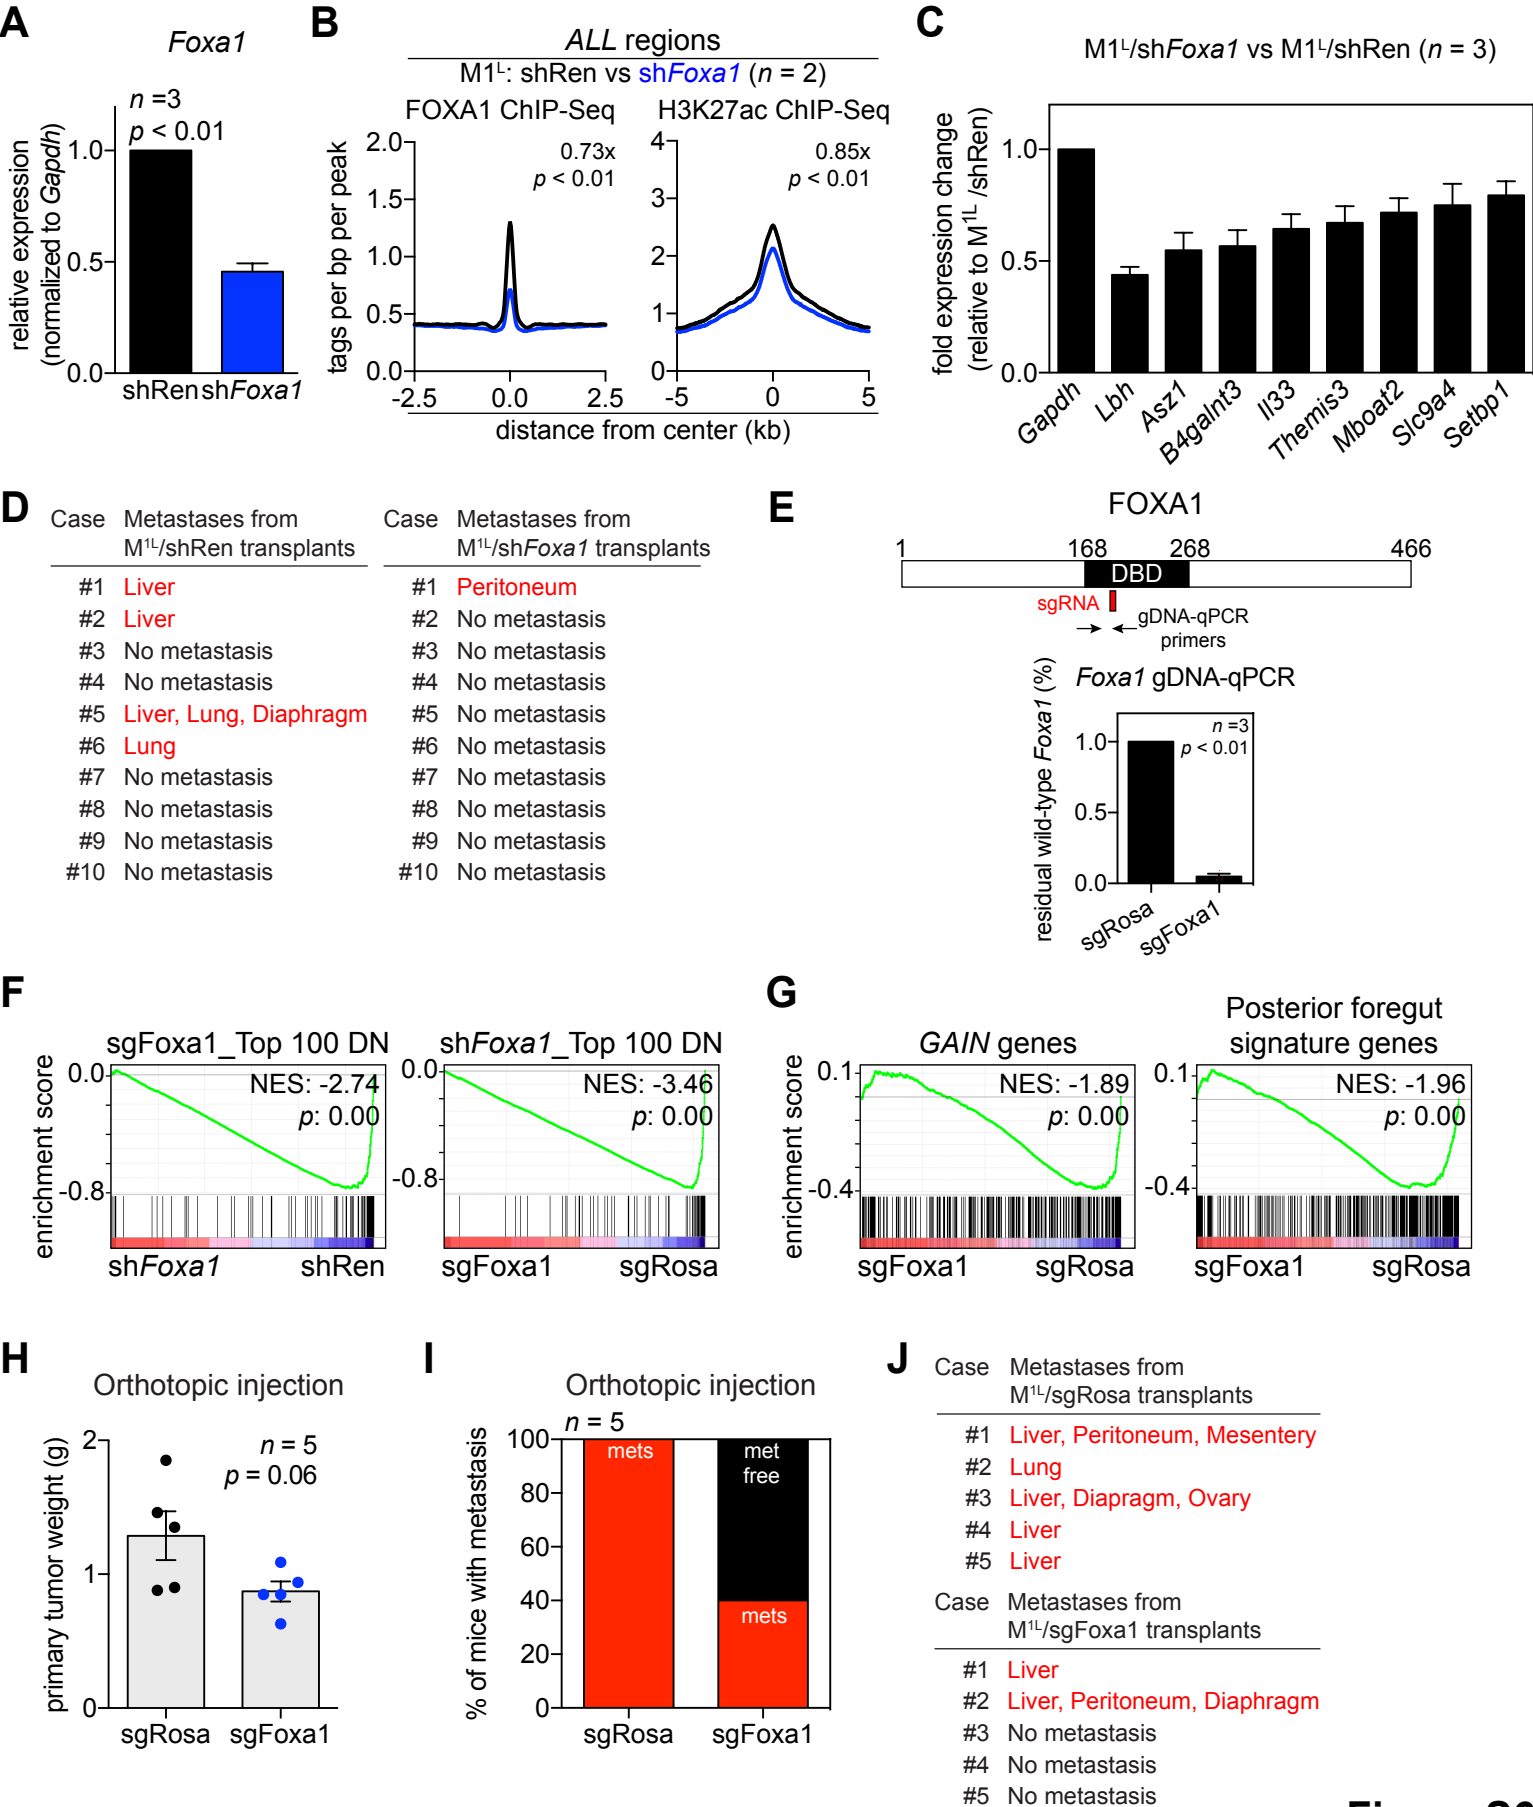

Figure S6

Supplement: NIHMS895831-supplement-6.pdf [file NIHMS895831-supplement-6.pdf]
